# Supplementary material for: Colloidal deposition synthesis of supported gold nanocatalysts based on Au–Fe3O4 dumbbell nanoparticles
Source: Royal Society of Chemistry journal article supplement (doi:10.1039/b807591c), 2008-01-01
Supplement: b807591c.pdf [file b807591c.pdf]

Supporting Materials:

## Colloidal Deposition Synthesis of Supported Gold Nanocatalysts Based on Au-Fe<sub>3</sub>O<sub>4</sub> Dumbbell Nanoparticles

Hongfeng Yin,<sup>1</sup> Chao Wang,<sup>2</sup> Haoguo Zhu,<sup>1</sup> Steven H. Overbury,<sup>1</sup> Shouheng Sun,<sup>2\*</sup>

Sheng Dai<sup>1\*</sup>

<sup>1</sup>*Chemical Sciences Division, Oak Ridge National Laboratory, TN 37831, USA*

<sup>2</sup>*Department of Chemistry, Brown University, Providence, Rhode Island 02912, USA*

### Experimental Section

#### 1. Synthesis of supported Au-Fe<sub>3</sub>O<sub>4</sub> dumbbell catalysts

Au-Fe<sub>3</sub>O<sub>4</sub> dumbbell nanoparticles were synthesized according to a modified reference method.<sup>S1</sup> The resulting nanoparticles (unwashed) were washed via dispersion in hexane and precipitation in ethanol for 4 times before dispersing in hexane, with help of sonication and mixing with a solid support [CabOSil (Aldrich), P25 (Degussa), and carbopack (Supelco, Inc)] under vigorous stirring. The approximate ratio of dumbbell nanoparticles to supports is 1:6 in weight. Hexane was evaporated and the resulting powder was dried under vacuum at 60 °C overnight. The final catalyst is named as “as synthesized”.

#### 2. Synthesis of supported Au/SiO<sub>2</sub> catalysts.

Au/SiO<sub>2</sub> was synthesized according to the deposition-precipitation method in our previous work.<sup>S2</sup>

### 3. Pretreatment for stability test under HNO<sub>3</sub> vapor

The “as-synthesized” catalyst (80 mg) was packed into a U-shaped silica tube, and calcined at 500 °C, 300 °C, 300 °C for the support CabOSil, P25, and carbopack, respectively, in 8% O<sub>2</sub>/He mixture for 1 h. The resulting powder was exposed to concentrated HNO<sub>3</sub> vapor at room temperature for 12 h and used to perform CO oxidation.

### 3. Catalysis test: CO oxidation

To perform CO oxidation reaction test, 53 mg of a catalyst (either “as synthesized” or HNO<sub>3</sub> vapor treated) was packed into a U-shaped silica tube (4 mm i.d.) on an Altamira AMI 200 microreactor. The catalysts supported on CabOSil, P25, and carbopack were calcined at 500 °C, 300 °C, and 300 °C, respectively, in 8% O<sub>2</sub>/He mixture for 1 h to remove possible organic residues or moisture. The catalysts were cooled down to room temperature and the gas stream was switched to 1% CO (balance air, < 4 ppm H<sub>2</sub>O) through the catalysts at a rate of 37 cm<sup>3</sup>/min [space velocity 41900 cm<sup>3</sup>/(h·g<sub>cat</sub>)]. A portion of the product stream was extracted periodically with an automatic sample valve, and analyzed by a dual-column GC with a thermal conductivity detector.

### 4. Catalyst characterization

To characterize catalysts, XRD data were collected on a Siemens D5005 diffractometer with Cu K<sub>α</sub> radiation ( $\lambda = 1.5418 \text{ \AA}$ ). Scans were performed at a rate of 0.01°/s for TiO<sub>2</sub>-based catalysts and 0.005°/6s for SiO<sub>2</sub>- and carbon-based catalysts, typically in the range of  $2\theta = 20\text{--}90^\circ$ . The average gold particle sizes were estimated from X-ray line broadening analysis applying the Debye-Scherrer equation on the (111)

diffraction ( $2\theta = 44^\circ$ ). All “as synthesized” catalysts have the similar gold particle sizes of  $3.0 \pm 0.1$  nm. The gold and iron contents were estimated by EDAX on a JOEL JSM-6060 scanning electron microscope coupled with an EDAX detector. TEM (transmission electron microscopy) images were taken on a Hitachi HD2000 STEM electron microscope operated at 200 kV.

## Results

**Table S1**  $T_{50}$  of Au-Fe<sub>3</sub>O<sub>4</sub> dumbbell nanoparticle-based catalysts in CO oxidation

| Catalyst                                                                         | Au loading / wt% | Pretreatment  | $T_{50}$ / °C |
|----------------------------------------------------------------------------------|------------------|---------------|---------------|
| Au-Fe <sub>3</sub> O <sub>4</sub>                                                | 6.55             | <sup>1)</sup> | N/A           |
| Au-Fe <sub>3</sub> O <sub>4</sub> , washed with hexane/ethanol                   | 6.55             | <sup>1)</sup> | -25           |
| Au-Fe <sub>3</sub> O <sub>4</sub> /TiO <sub>2</sub> , unwashed                   | 1.60             | <sup>1)</sup> | 260           |
| Au-Fe <sub>3</sub> O <sub>4</sub> /SiO <sub>2</sub> , washed with hexane/ethanol | 1.67             | <sup>2)</sup> | -40           |
| Au-Fe <sub>3</sub> O <sub>4</sub> /TiO <sub>2</sub> , washed with hexane/ethanol | 1.62             | <sup>1)</sup> | 68            |
| Au-Fe <sub>3</sub> O <sub>4</sub> /C, washed with hexane/ethanol                 | 1.52             | <sup>1)</sup> | 17            |

1) 8% O<sub>2</sub>/He, 300°C, 1h; 2) 8% O<sub>2</sub>/He, 500°C, 1h;

**Table S2** Average gold particle sizes (nm) in supported Au-Fe<sub>3</sub>O<sub>4</sub> dumbbell catalysts

| Treatment method<br>Support | Calcination       | HNO <sub>3</sub>  |
|-----------------------------|-------------------|-------------------|
| SiO <sub>2</sub>            | 2.9 <sup>1)</sup> | 3.0 <sup>2)</sup> |
| TiO <sub>2</sub>            | 3.4 <sup>3)</sup> | 3.4 <sup>4)</sup> |
| carbon                      | 3.0 <sup>3)</sup> | 4.2 <sup>4)</sup> |

1) 8% O<sub>2</sub>/He, 500°C, 1h; 2) 8% O<sub>2</sub>/He, 500°C, 1h / HNO<sub>3</sub> vapor, 12h / 8% O<sub>2</sub>/He, 500°C, 1h; 3) 8% O<sub>2</sub>/He, 300°C, 1h; 4) 8% O<sub>2</sub>/He, 300°C, 1h / HNO<sub>3</sub> vapor, 12h / 8% O<sub>2</sub>/He, 300°C, 1h.

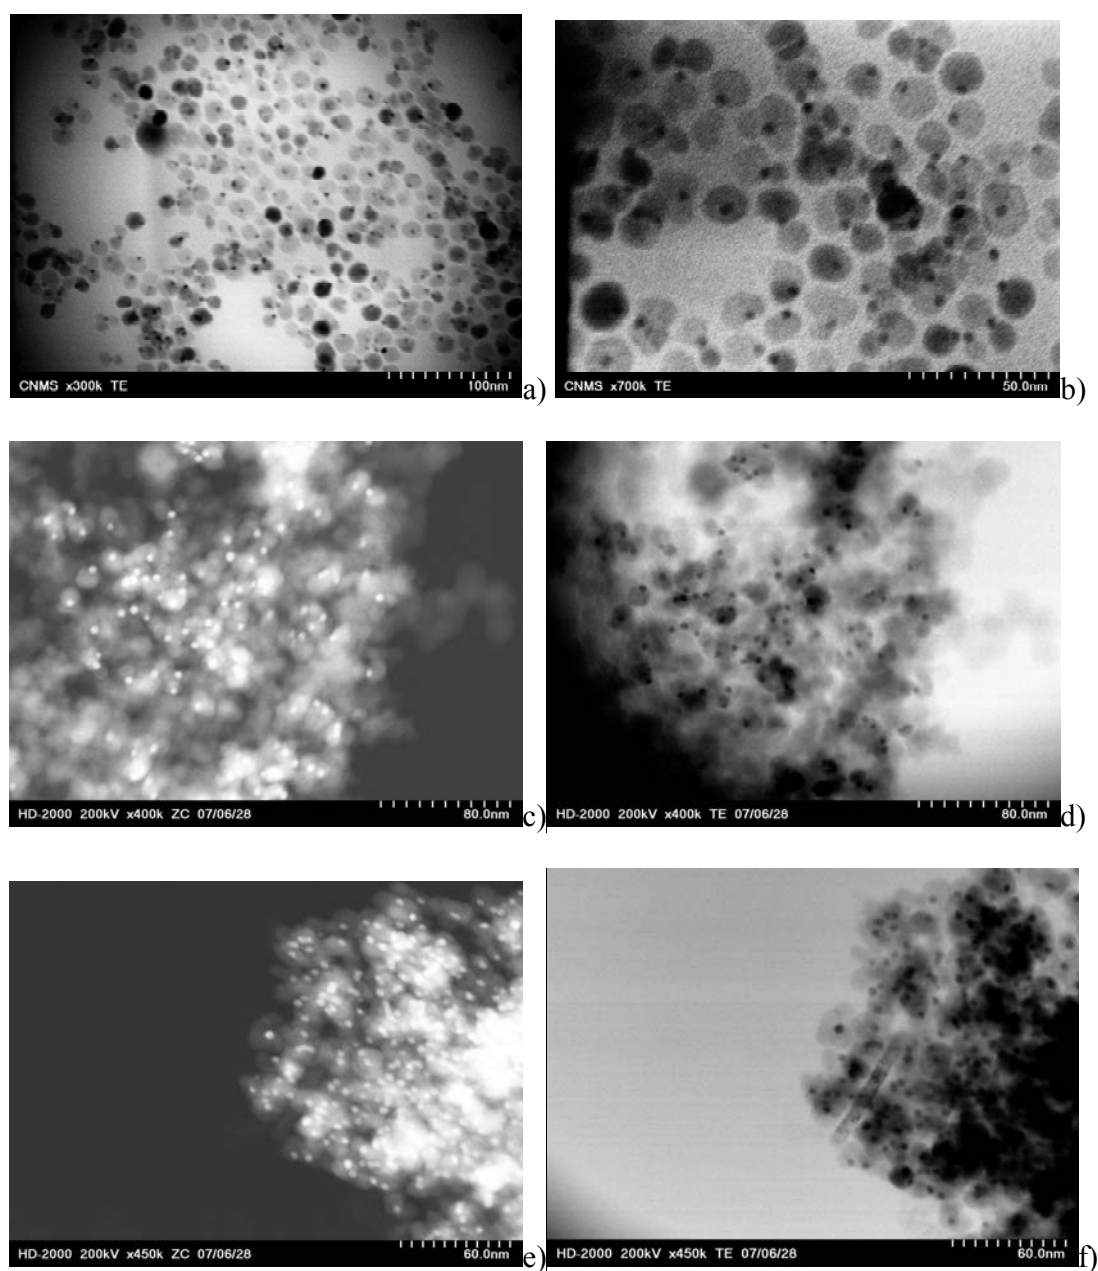

**Figure S1** TEM of Au-Fe<sub>3</sub>O<sub>4</sub> : a), b) Au-Fe<sub>3</sub>O<sub>4</sub> dispersed in hexane, Au nanoparticle size 2.5 ~ 3.5 nm, Fe<sub>3</sub>O<sub>4</sub> nanoparticle size 15 ~ 20 nm; c), d) Au-Fe<sub>3</sub>O<sub>4</sub> deposited on TiO<sub>2</sub> (P25): c) dark field, d) bright field; e), f) Au-Fe<sub>3</sub>O<sub>4</sub> deposited on carbon (carbopack): e) dark field, f) bright field.

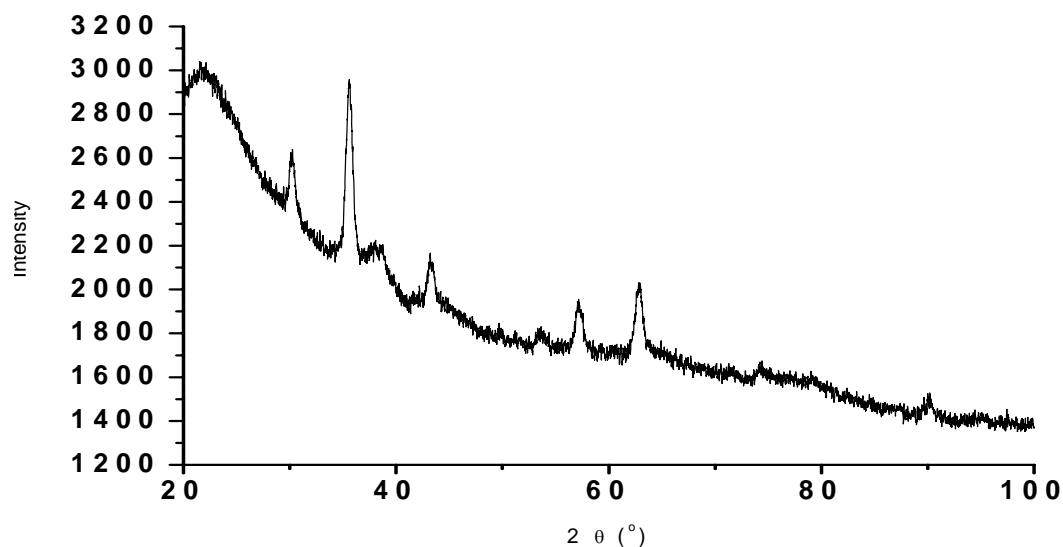

**Figure S2** XRD pattern of as-synthesized Au-Fe<sub>3</sub>O<sub>4</sub> dumbbell nanoparticles. Average gold particle sizes were estimated to be 2.9 nm from X-ray line broadening analysis applying the Debye-Scherrer equation on the (111) diffraction ( $2\theta = 44^\circ$ ).

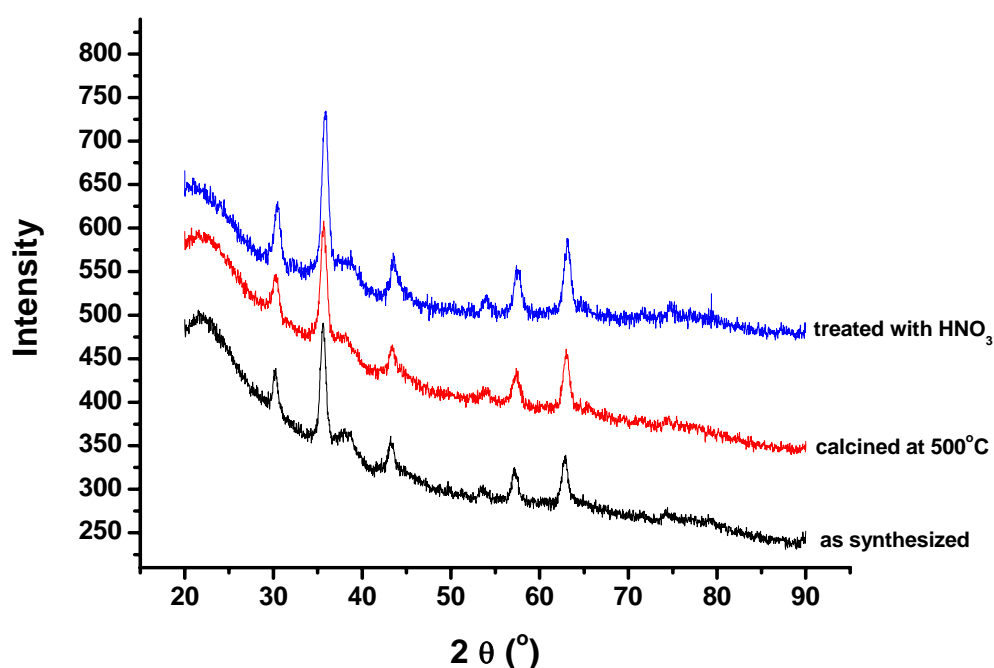

**Figure S3** XRD pattern of Au-Fe<sub>3</sub>O<sub>4</sub> dumbbell catalysts deposited on SiO<sub>2</sub> (CabOSil).

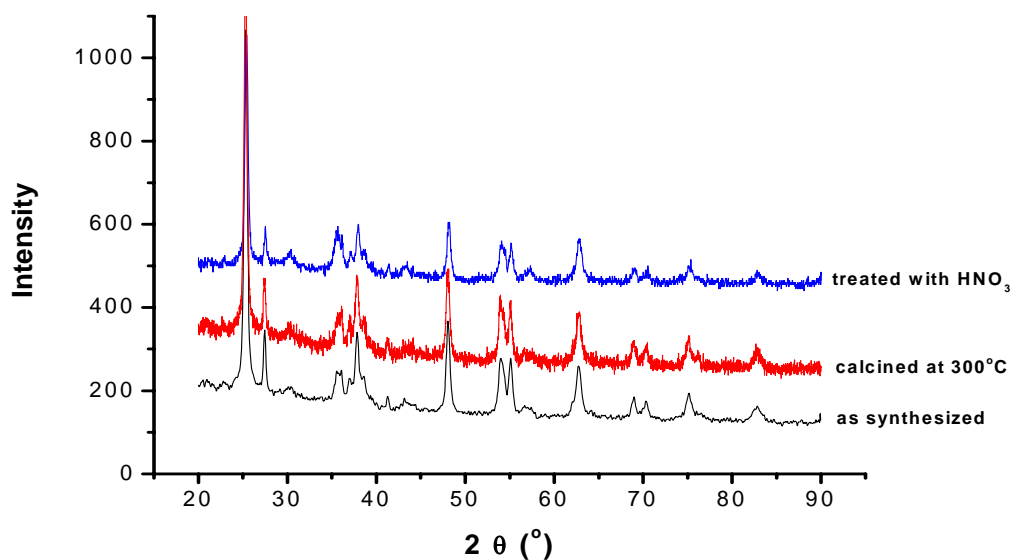

**Figure S4** XRD pattern of Au-Fe<sub>3</sub>O<sub>4</sub> dumbbell catalysts deposited on TiO<sub>2</sub> (P25).

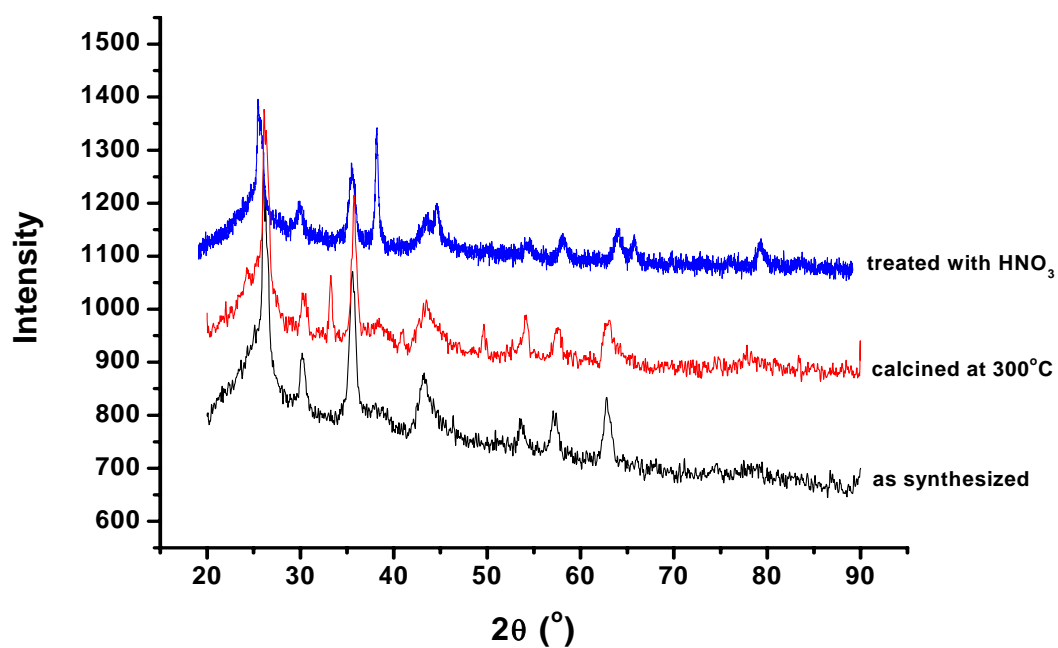

**Figure S5** XRD pattern of Au-Fe<sub>3</sub>O<sub>4</sub> dumbbell catalysts deposited on carbon (carbopack).

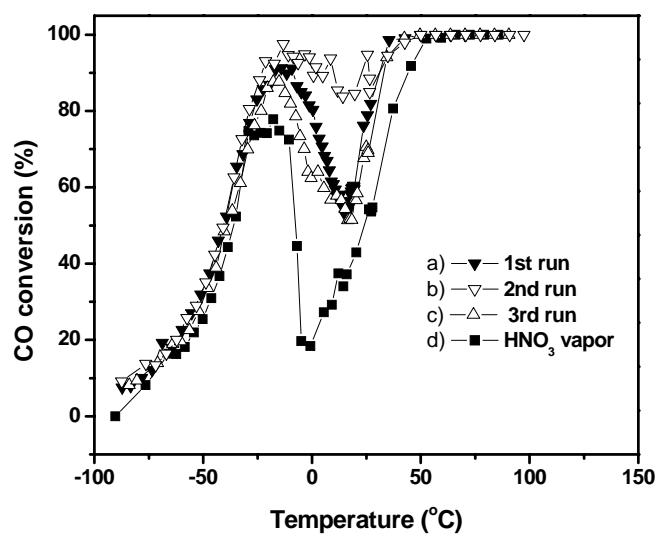

**Figure S6** Light-off curves of CO oxidation with Au-Fe<sub>3</sub>O<sub>4</sub>/SiO<sub>2</sub>. a), b), c): calcined at 500°C for 1 h for 1, 2, and 3 times; d): first calcined at 500°C for 1 h, then exposed to HNO<sub>3</sub> vapor for 12 h, then calcined at 500°C for 1 h.

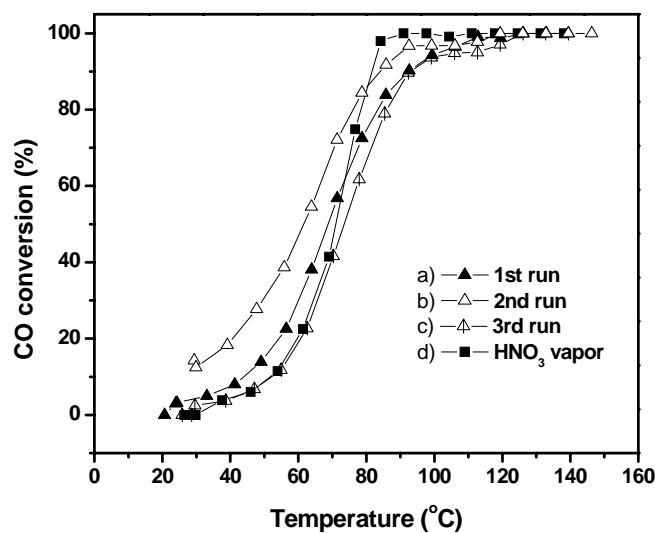

**Figure S7** Light-off curves of CO oxidation with Au-Fe<sub>3</sub>O<sub>4</sub>/TiO<sub>2</sub>. a), b), c): calcined at 300°C for 1 h for 1, 2, and 3 times; d): first calcined at 300°C for 1 h, subsequently exposed to HNO<sub>3</sub> vapor for 12 h, then calcined at 300°C for 1 h.

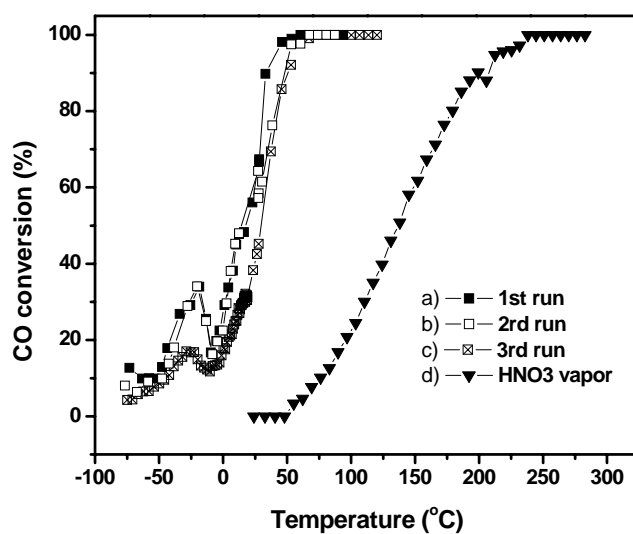

**Figure S8** Light-off curves of CO oxidation with Au-Fe<sub>3</sub>O<sub>4</sub>/carbon. a), b), c): calcined at 300°C for 1 h for 1, 2, and 3 times; d): first calcined at 300°C for 1 h, then exposed to HNO<sub>3</sub> vapor for 12 h, then calcined at 300°C for 1 h.

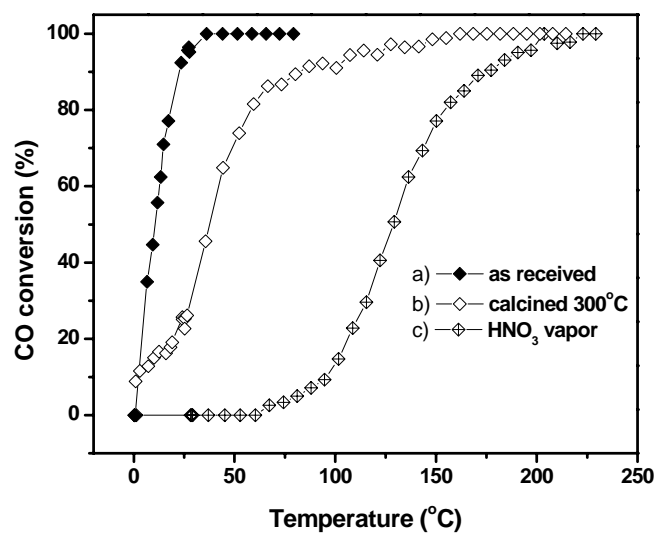

**Figure S9** Light-off curves of CO oxidation with commercialized Au-Fe<sub>2</sub>O<sub>3</sub> catalyst.

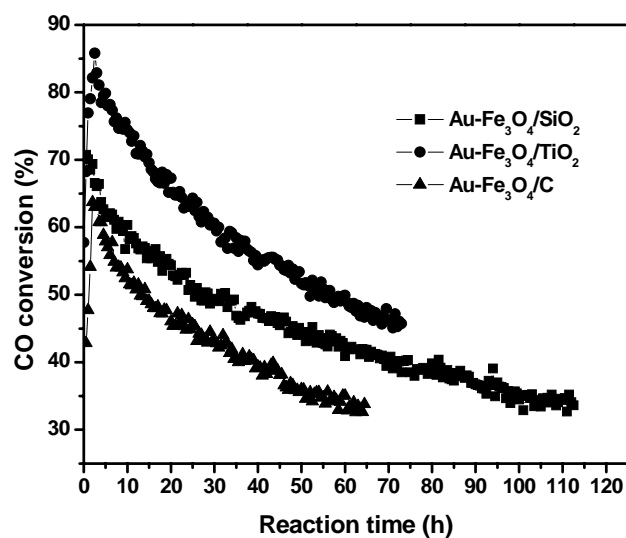

**Figure S10** Catalyst durability (long-life) test for Au-Fe<sub>3</sub>O<sub>4</sub> dumbbell nanoparticles supported on SiO<sub>2</sub>, TiO<sub>2</sub> and Carbon.

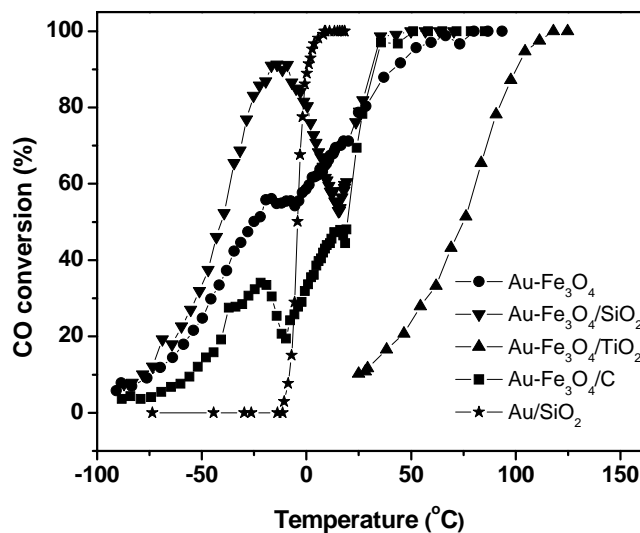

**Figure S11** CO oxidation conversion light-off curves of catalysts: Au/SiO<sub>2</sub>, Au-Fe<sub>3</sub>O<sub>4</sub> deposited on SiO<sub>2</sub>, TiO<sub>2</sub> and carbon: Au-Fe<sub>3</sub>O<sub>4</sub>: Au-Fe<sub>3</sub>O<sub>4</sub> nanoparticles calcined at 300 °C for 1h; Au-Fe<sub>3</sub>O<sub>4</sub>/SiO<sub>2</sub>: Au-Fe<sub>3</sub>O<sub>4</sub> deposited on SiO<sub>2</sub> was calcined at 500 °C for 1h; Au-Fe<sub>3</sub>O<sub>4</sub>/TiO<sub>2</sub>: Au-Fe<sub>3</sub>O<sub>4</sub> deposited on TiO<sub>2</sub> was calcined at 300 °C for 1h; Au-Fe<sub>3</sub>O<sub>4</sub>/C: Au-Fe<sub>3</sub>O<sub>4</sub> deposited on carbon was calcined at 300 °C for 1h; Au/SiO<sub>2</sub> (Au: 2%), calcined at 500°C for 1h.

## Reference

- S1. H. Yu, M. Chen, P. M. Rice, S. X. Wang, R. L. White and S. H. Sun, *Nano Letters*, 2005, **5**, 379-382.
- S2. H. Zhu, Z. Ma, J. C. Clark, Z. Pan, S. H. Overbury and S. Dai, *Applied Catalysis A: General*, 2007, **326**, 89-99.
